# Supplementary material for: Wave transmissions at low-crested structures. Stability of tetrapods at front, crest and rear of a low-crested breakwater
Source: Royal Society of Chemistry journal article supplement (doi:10.1039/d3mh00420a), 1996-08-30
Supplement: d3mh00420a1.pdf [file d3mh00420a1.pdf]

## Supporting Information

### **The effects of intercalated environmental gas molecules on the carrier dynamics in WSe<sub>2</sub>/WS<sub>2</sub> heterostructures**

Yanxue Zhang,<sup>‡a</sup> Hongsheng Liu,<sup>‡a</sup> Yanyan Zhao,<sup>a</sup> Jiaqi Lin<sup>c\*</sup>, Yizhen Bai,<sup>a</sup> Jijun Zhao<sup>\*a,b</sup>,  
Junfeng Gao<sup>\*a,b</sup>

<sup>a</sup> Key laboratory of Materials Modification by Laser, Ion and Electron Beams (Dalian University of Technology), Ministry of Education, Dalian, 116024, China

<sup>b</sup> State Key Laboratory of Structural Analysis for Industrial Equipment, Dalian University of Technology, Dalian, 116024, China

<sup>c</sup> The School of Bioengineering, Dalian University of Technology, Dalian, 116024, China

<sup>‡</sup>These authors contributed equally to the work

*Email:* [gaojf@dlut.edu.cn](mailto:gaojf@dlut.edu.cn), [zhaojj@dlut.edu.cn](mailto:zhaojj@dlut.edu.cn), [jqlin@dlut.edu.cn](mailto:jqlin@dlut.edu.cn)

## Table of contents

|                                                                                                                                                                                                                                                                                                                                                                                                                                                                                  |    |
|----------------------------------------------------------------------------------------------------------------------------------------------------------------------------------------------------------------------------------------------------------------------------------------------------------------------------------------------------------------------------------------------------------------------------------------------------------------------------------|----|
| <b>Computational methods</b> .....                                                                                                                                                                                                                                                                                                                                                                                                                                               | 4  |
| <b>Figure S1.</b> Band structures of optimized primitive cell of (a) WS <sub>2</sub> and (b) WSe <sub>2</sub> monolayer under 0%, 2% and 4% strain, respectively. The plus sign and minus sign denote tension and compression, respectively. The Fermi energy level is set as zero. ....                                                                                                                                                                                         | 7  |
| <b>Figure S2.</b> (a-b) Top and side views of optimized primitive cell of WSe <sub>2</sub> /WS <sub>2</sub> heterostructure. (c) Projected band structures of WSe <sub>2</sub> /WS <sub>2</sub> heterostructure. The color bar describes the contribution from WSe <sub>2</sub> layer (red part) and WS <sub>2</sub> layer (blue part), respectively. ....                                                                                                                       | 8  |
| <b>Figure S3.</b> (a-i) The initial and optimized structure of O <sub>2</sub> molecule intercalated heterostructures. ....                                                                                                                                                                                                                                                                                                                                                       | 9  |
| <b>Table S1.</b> The bond lengths of O/W/S/Se-O bond and interlayer distance <i>d</i> for the optimized structure in Figure S3.....                                                                                                                                                                                                                                                                                                                                              | 10 |
| <b>Figure S4.</b> The dissociation pathway and barrier of O <sub>2</sub> molecule in the interlayer of WSe <sub>2</sub> /WS <sub>2</sub> heterostructure. The inset shows the top and side view of the structure of initial state (IS), transition state (TS) and final state (FS). ....                                                                                                                                                                                         | 11 |
| <b>Figure S5.</b> The charge density difference and the planar-average charge density difference along the Z direction of (a) pristine, (b) O <sub>2</sub> intercalated, (c) H <sub>2</sub> O intercalated and (d) N <sub>2</sub> intercalated WSe <sub>2</sub> /WS <sub>2</sub> vdW heterostructures, respectively. The pink and green color represents the charge accumulation and depletion, respectively. The isosurface value is set as 0.0001  e /Bohr <sup>3</sup> . .... | 12 |
| <b>Figure S6.</b> (a-e) The optimized structure of H <sub>2</sub> O intercalated WSe <sub>2</sub> /WS <sub>2</sub> vdW heterostructures. ....                                                                                                                                                                                                                                                                                                                                    | 13 |
| <b>Table S2.</b> The bond lengths of O-H, S-H and Se-H and bond angle of HOH and <i>d</i> for the optimized structure in Figure S6.....                                                                                                                                                                                                                                                                                                                                          | 14 |
| <b>Figure S7.</b> (a-d) The initial and optimized structure of N <sub>2</sub> intercalated WSe <sub>2</sub> /WS <sub>2</sub> vdW heterostructures. ....                                                                                                                                                                                                                                                                                                                          | 15 |

**Table S3.** The bond lengths of N-N, N-S, N-Se and  $d$  for the optimized structure in Figure S7. 16

**Figure S8.** (a) The top and side view of optimized bilayer  $\text{WS}_2$ . The primitive cell is marked by black dashed line. The initial (left panel) and optimized (right panel) structure of (b)  $\text{O}_2$  intercalated, (c)  $\text{H}_2\text{O}$  intercalated and (d)  $\text{N}_2$  intercalated bilayer  $\text{WS}_2$ , respectively. ....17

**Figure S9.** (a) The lattice of primitive cell (red line) and supercell (blue line) of  $\text{WSe}_2/\text{WS}_2$  vdW heterostructure. (b) The corresponding high symmetric K points. ....18

**Figure S10.** The projected band structures of supercell and corresponding unfolding band structures for (a, b) pristine, (c, d)  $\text{O}_2$  intercalated, (e, f)  $\text{H}_2\text{O}$  intercalated and (g, h)  $\text{N}_2$  intercalated heterostructures. Blue, red and green color circles are states contributed by  $\text{WS}_2$  layer,  $\text{WSe}_2$  layer and intercalation molecule, respectively. The CBM band offset  $\Delta E_c$  and VBM band offset  $\Delta E_v$  is marked in (b). ....19

**Table S4.** The  $\Delta E_c$  and  $\Delta E_v$  of pristine,  $\text{O}_2$  intercalated,  $\text{H}_2\text{O}$  intercalated and  $\text{N}_2$  intercalated heterostructures. ....20

**Figure S11.** The time-dependent spatial electron localization on (a, i) pristine, (b, j)  $\text{O}_2$  intercalated, (c, k)  $\text{H}_2\text{O}$  intercalated and (d, l)  $\text{N}_2$  molecule intercalated  $\text{WSe}_2/\text{WS}_2$  vdW heterostructures at 300 K and 78 K, respectively. The time-dependent electron energy of (e, m) pristine, (f, n)  $\text{O}_2$  intercalated, (g, o)  $\text{H}_2\text{O}$  intercalated and (h, p)  $\text{N}_2$  intercalated  $\text{WSe}_2/\text{WS}_2$  vdW heterostructures at 300 K and 78 K, respectively. The color strips represent the distribution of electron on different energy level orbitals. The darker the color, the more electrons are distribution in this orbital. The blue dashed line denotes the average electron energy. The energy reference is the Fermi level of each system. ....21

**Figure S12.** The time-dependent spatial hole localization on (a, i) pristine, (b, j)  $\text{O}_2$  intercalated, (c, k)  $\text{H}_2\text{O}$  intercalated and (d, l)  $\text{N}_2$  molecule intercalated  $\text{WSe}_2/\text{WS}_2$  vdW heterostructures at 300 K and 78 K, respectively. The time-dependent hole energy of (e, m) pristine, (f, n)  $\text{O}_2$  intercalated, (g, o)  $\text{H}_2\text{O}$  intercalated and (h, p)  $\text{N}_2$  intercalated  $\text{WSe}_2/\text{WS}_2$  vdW heterostructures at 300 K and 78 K, respectively. The color strips represent the distribution of hole on different energy level orbitals. The darker the color, the more holes are distribution in this orbital. The blue dashed line denotes the average hole energy. The energy reference is the Fermi level of each system. ....23

**Figure S13.** The time-dependent electron population on (a, e) pristine, (b, f)  $\text{O}_2$  intercalated, (c, g)  $\text{H}_2\text{O}$  intercalated and (d, h)  $\text{N}_2$  molecule intercalated  $\text{WSe}_2/\text{WS}_2$  vdW heterostructures at 300 K and 78 K, respectively. ....25

**Figure S14.** The time-dependent energy level evolution at  $\Gamma$  point of (a) pristine, (b)  $\text{O}_2$  intercalated, (c)  $\text{H}_2\text{O}$  intercalated and (d)  $\text{N}_2$  intercalated  $\text{WSe}_2/\text{WS}_2$  vdW heterostructures at 78 K, respectively. The color bar in (a-d) represents the contribution from  $\text{WSe}_2$  layer (red part) and  $\text{WS}_2$  layer (blue part), respectively. Fourier transforms of the donor and relevant acceptor energy

states during the process of electron transfer and hole transfer in (e, i) pristine, (f, j) O<sub>2</sub> intercalated, (g, k) H<sub>2</sub>O intercalated and (h, l) N<sub>2</sub> intercalated WSe<sub>2</sub>/WS<sub>2</sub> vdW heterostructures at 78 K, respectively. The color bar in (e-l) represent the band number. ....26

**Figure S15.** The phonon spectra of (a) pristine, (b) O<sub>2</sub> intercalated, (c) H<sub>2</sub>O intercalated and (d) N<sub>2</sub> intercalated heterostructures, respectively.....27

**Figure S16.** The averaged NAC values between the orbitals in the process of electron transfer, hole transfer and recombination in (a, e, i) pristine, (b, f, j) O<sub>2</sub> intercalated, (c, g, k) H<sub>2</sub>O intercalated and (d, h, l) N<sub>2</sub> intercalated WSe<sub>2</sub>/WS<sub>2</sub> vdW heterostructures at 78 K, respectively. Here, C+1, C+2, ... means CBM+1, CBM+2, ... level, respectively; V-1, V-2, ...means VBM-1, VBM-2, ... energy level, respectively.....28

**Figure S17.** The band gap distribution during MD simulation of pristine, O<sub>2</sub> intercalated, H<sub>2</sub>O intercalated and N<sub>2</sub> intercalated WSe<sub>2</sub>/WS<sub>2</sub> vdW heterostructures at (a) 300 K and (b) 78 K, respectively. The average PBE band gap values are labeled in the center. ....29

**Figure S18.** Fourier transforms of CBM and VBM of pristine, O<sub>2</sub> intercalated, H<sub>2</sub>O intercalated and N<sub>2</sub> intercalated heterostructures at (a) 300 K and (b) 78 K, respectively. ....30

**Figure S19.** The RMSD of S, Se and W atoms during MD simulation of (a, e) pristine, (b, f) O<sub>2</sub> intercalated, (c, g) H<sub>2</sub>O intercalated and (d, h) N<sub>2</sub> intercalated WSe<sub>2</sub>/WS<sub>2</sub> vdW heterostructures at 300 K and 78 K, respectively. ....31

**References**.....32

## Computational methods

Our first-principle calculations were performed using Vienna Ab Initio Simulation Package (VASP).<sup>1</sup> The projector augmented wave (PAW) scheme was used to describe the core electrons.<sup>2</sup> The exchange-related interaction was tackled by Perdew-Burke-Ernzerhof functional (PBE) within generalized gradient approximation (GGA).<sup>3</sup> The DFT-D2 method was adopted to describe the weak van der Waals interactions.<sup>4</sup> The plane wave energy cutoff was set as 500 eV. The convergence criteria of total energy and force were set at  $10^{-5}$  eV and 0.001 eV/Å, respectively. A larger than 20 Å vacuum region was used to avoid the interaction of neighbor layer. The  $12 \times 12 \times 1$  and  $1 \times 1 \times 1$  Monkhorst k-point mesh was used for primitive cell and  $3 \times 3 \times 1$  orthogonal supercell.<sup>5</sup> All atoms were fully relaxed but the cell parameter is fixed.

The  $\Gamma$  point carrier dynamic process was based on the orthogonal  $3 \times 3 \times 1$  supercell (pristine: 108 atoms, O<sub>2</sub> intercalation: 110 atoms, H<sub>2</sub>O intercalation: 111 atoms, N<sub>2</sub> intercalation: 110 atoms), as showed in Figure 1a-de. The velocity rescaling method was used to heat pristine, O<sub>2</sub>, H<sub>2</sub>O and N<sub>2</sub> molecule intercalated WSe<sub>2</sub>/WS<sub>2</sub> heterostructures to 300 K and 78 K, respectively. Then, *ab initio* nonadiabatic molecular dynamics (NAMD) simulations were carried out by using the Hefei-NAMD<sup>6</sup> code. The fewest switches surface hopping (FSSH)<sup>7</sup> method was used to investigated the process of electron and hole separation process. Since the quantum decoherence has a large influence on process with energy gap, the decoherence-induced surface hopping (DISH)<sup>8</sup> method was used to study the recombination dynamic. For pristine heterostructure, 5 ps and 2 ns microcanonical *ab initio* molecular dynamics<sup>9</sup> (AIMD) trajectories were generated with time step of 1 fs for electron hole separation and recombination simulation, respectively. Results of NAMD and DISH simulations were obtained by averaging over 100 and 50 different initial configurations, respectively. Then, for each selected structure, 20000 trajectories were sampled for last 3 ps for electron hole separation process, and 500 trajectories were sampled in 2 ns for the electron hole recombination simulation. For O<sub>2</sub> intercalated, H<sub>2</sub>O intercalated and N<sub>2</sub> intercalated heterostructures, 5 ps and 2 ns microcanonical AIMD trajectories were generated with time step of 1 fs for carrier relaxation and recombination simulation, respectively. Results of NAMD and DISH simulation were obtained by averaging over 100 and 50 different initial structures, respectively. We sampled 20000 and 500 trajectories for last 2ps and 2 ns for the electron hole separation and recombination simulation, respectively.

To start the NAMD simulation electron transfer process, according to the CBM band offset, at 300 K, we set the following initial conditions. For pristine heterostructure, we set the photo-generated electron initially at CBM+21 (the CBM of WSe<sub>2</sub> layer) (CBM+13, 78K) as the electron donor state, and the CBM (the CBM of WS<sub>2</sub> layer) as the electron acceptor. For O<sub>2</sub> intercalated heterostructure, the photo-generated electron was initially set at CBM+30 (the CBM of WSe<sub>2</sub> layer) (CBM+27, 78K) as the electron donor state, and the CBM (the CBM of WS<sub>2</sub>O<sub>2</sub> layer) as the electron acceptor. Since the intercalated O<sub>2</sub> spontaneously dissociates on the WS<sub>2</sub> surface, we argue that the O atoms to be an inseparable part of WS<sub>2</sub> and label it as WS<sub>2</sub>O<sub>2</sub> in this paper. For H<sub>2</sub>O intercalation heterostructure, we set the photo-generated electron initially localized at CBM+285 (the CBM of WSe<sub>2</sub> layer) (CBM+28, 78K) as the electron donor state and the CBM (the CBM of WS<sub>2</sub> layer) as the electron acceptor. For N<sub>2</sub> intercalation heterostructure, we set the photo-generated electron initially localized at CBM+18 (the CBM of WSe<sub>2</sub> layer) (CBM+19, 78K) as the electron donor state and the CBM (the CBM of WS<sub>2</sub> layer) as the electron acceptor.

Then, in hole transfer process, according to the VBM band offset, at 300K, we set the initial conditions as follows. For pristine heterostructure, we set the photo-generated hole initially at VBM-8 (the VBM of WS<sub>2</sub> layer) (VBM-10, 78K), which was the hole donor state, and the VBM (the VBM of WSe<sub>2</sub> layer) was set as the hole acceptor. For O<sub>2</sub> intercalated heterostructure, the photo-generated hole was initially set at VBM-13 (the VBM of WS<sub>2</sub>O<sub>2</sub> layer) (VBM-13, 78 K), which was the hole donor state, and the VBM (the VBM of WSe<sub>2</sub> layer) as the hole acceptor. For H<sub>2</sub>O intercalation heterostructure, the photo-generated hole was initially localized at VBM-15 (the VBM of WS<sub>2</sub> layer) (VBM-13, 78K), which was set as the hole donor state, and the VBM (the VBM of WSe<sub>2</sub> layer) was set as the hole acceptor. For N<sub>2</sub> intercalation heterostructure, the photo-generated hole was initially localized at VBM-10 (the VBM of WS<sub>2</sub> layer) (VBM-10, 78 K), which was set as the hole donor state, and the VBM (the VBM of WSe<sub>2</sub> layer) was set as the hole acceptor.

In the recombination process of pristine, O<sub>2</sub> and H<sub>2</sub>O and N<sub>2</sub> intercalated heterostructures, we initiate the photo-generated electron localized in the CBM of the whole system, which is the electron donor state, and set the VBM of the whole system as the hole acceptor.

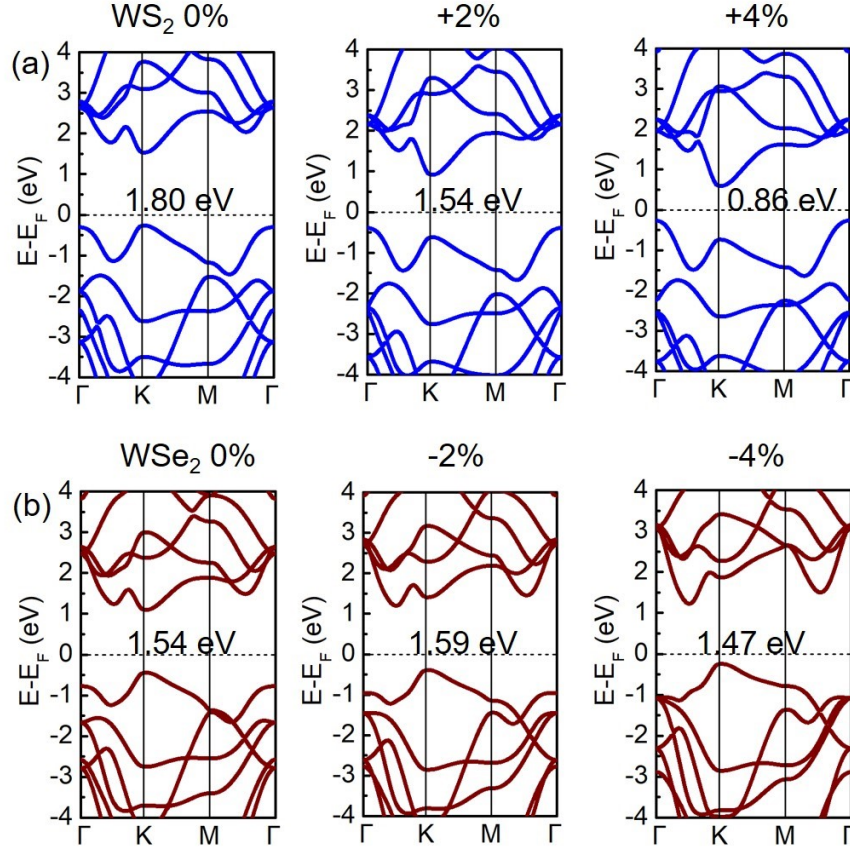

**Figure S1.** Band structures of optimized primitive cell of (a)  $\text{WS}_2$  and (b)  $\text{WSe}_2$  monolayer under 0%, 2% and 4% strain, respectively. The plus sign and minus sign denote tension and compression, respectively. The Fermi energy level is set as zero.

In order to reduce the lattice mismatch, the lattice constant of  $\text{WSe}_2/\text{WS}_2$  heterostructure is set to be the average value of the lattice constants of  $\text{WSe}_2$  and  $\text{WS}_2$ .  $\text{WSe}_2$  layer is compressed by 2% and the  $\text{WS}_2$  layer is stretched by 2%. To check the strain effect on the band gap, we calculated the band structures of  $\text{WSe}_2$  and  $\text{WS}_2$  monolayers with different strain as shown in Figure S1. The results show that strain of 4% has great effect on the band gap. Fortunately, strain of 2% has only small effect on the band gap. Therefore, deformation of both layers is a good choice to maintain the band gap.

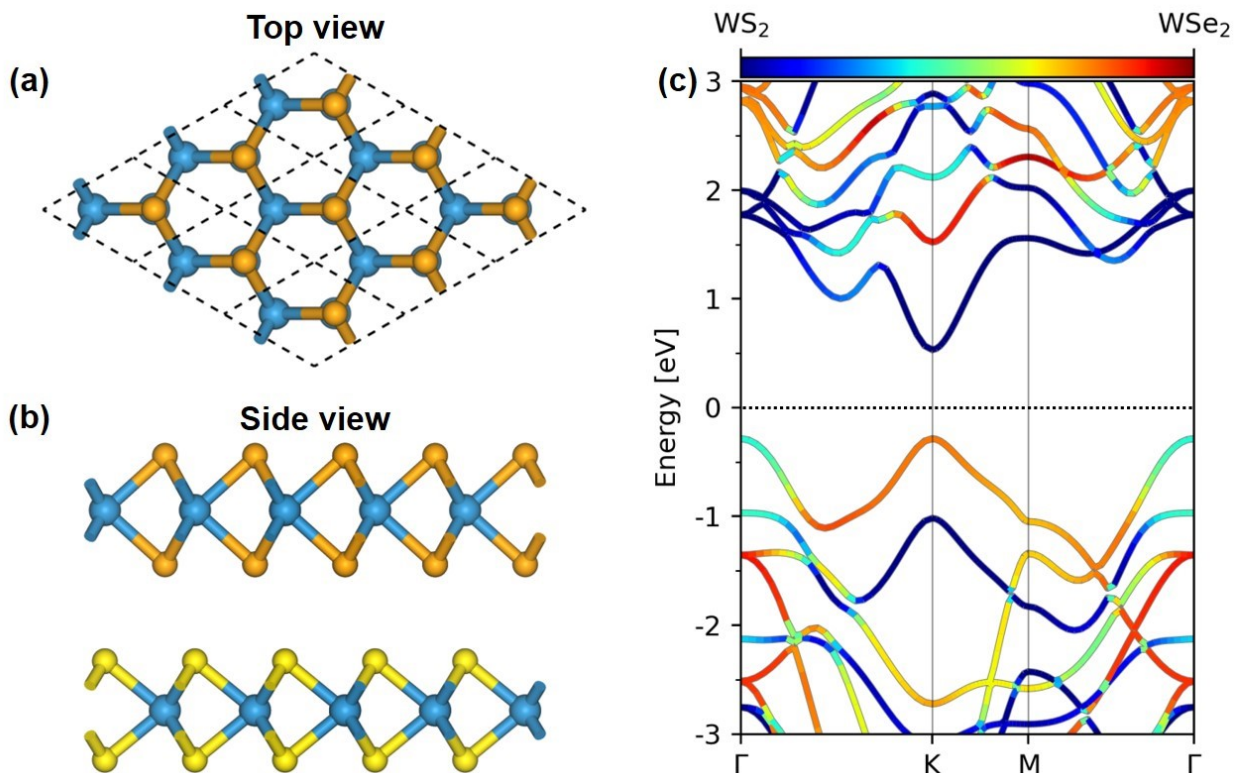

**Figure S2.** (a-b) Top and side views of optimized primitive cell of WSe<sub>2</sub>/WS<sub>2</sub> heterostructure. (c) Projected band structures of WSe<sub>2</sub>/WS<sub>2</sub> heterostructure. The color bar describes the contribution from WSe<sub>2</sub> layer (red part) and WS<sub>2</sub> layer (blue part), respectively.

According to the orbital projected band structures in Figure S2 for pristine WSe<sub>2</sub>/WS<sub>2</sub> vdW heterostructure, the valence band maximum (VBM) mainly originates from WSe<sub>2</sub> and the conduction band minimum (CBM) mainly comes from WS<sub>2</sub>. Therefore, WSe<sub>2</sub>/WS<sub>2</sub> vdW heterostructures exhibit typical type-II band alignment, which is promising for photocatalysts and solar cell due to the easy separation of photo-generated electron-hole pairs.

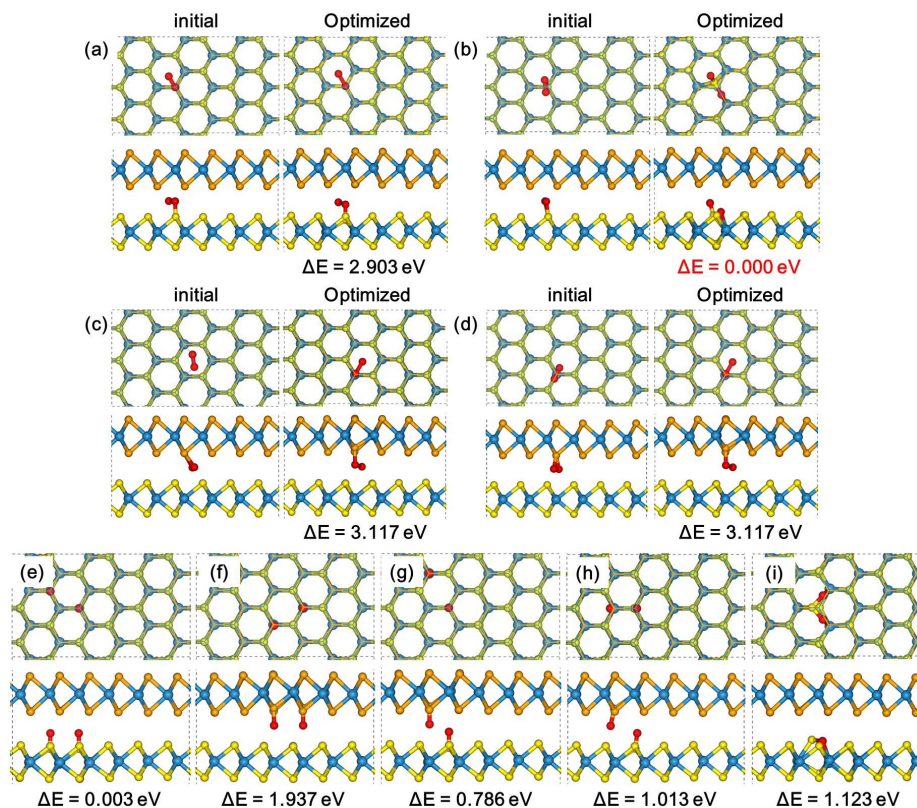

**Figure S3.** (a-i) The initial and optimized structure of  $O_2$  molecule intercalated heterostructures.

We tested three cases, molecule initial located at the interlayer site, initial adsorption on  $WS_2$  layer and initial adsorption on  $WSe_2$  layer. Intercalation at different positions in the interlayer of  $WSe_2/WS_2$  heterostructure for  $O_2$  has shown in the Figure S3. As shown in Figure S3,  $O_2$  molecule are more likely adsorbed and dissociated on  $WS_2$  layer.

**Table S1.** The bond lengths of O/W/S/Se-O bond and interlayer distance  $d$  for the optimized structure in Figure S3.

| <b>System</b>             | <b>Pristine</b> | <b>Vacuum</b> | <b>a</b> | <b>b</b> | <b>c</b> | <b>d</b>    |
|---------------------------|-----------------|---------------|----------|----------|----------|-------------|
| <b>O-O (Å)</b>            | -               | 1.233         | 1.485    | 2.417    | 1.440    | 1.440       |
| <b><math>d</math> (Å)</b> | 3.054           | -             | 3.123    | 3.124    | 3.102    | 3.104       |
| <b>System</b>             | <b>e</b>        | <b>f</b>      | <b>g</b> | <b>h</b> | <b>i</b> | <b>b</b>    |
| <b>W-O (Å)</b>            | -               | -             | -        | -        | 2.073    | 2.114       |
| <b>S-O (Å)</b>            | 1.474           | -             | 1.479    | 1.476    | 1.544    | 1.463/1.535 |
| <b>Se-O (Å)</b>           | -               | 1.662         | 1.670    | 1.672    | -        | -           |
| <b><math>d</math> (Å)</b> | 3.104           | 3.126         | 3.11     | 3.111    | 3.152    | 3.124       |

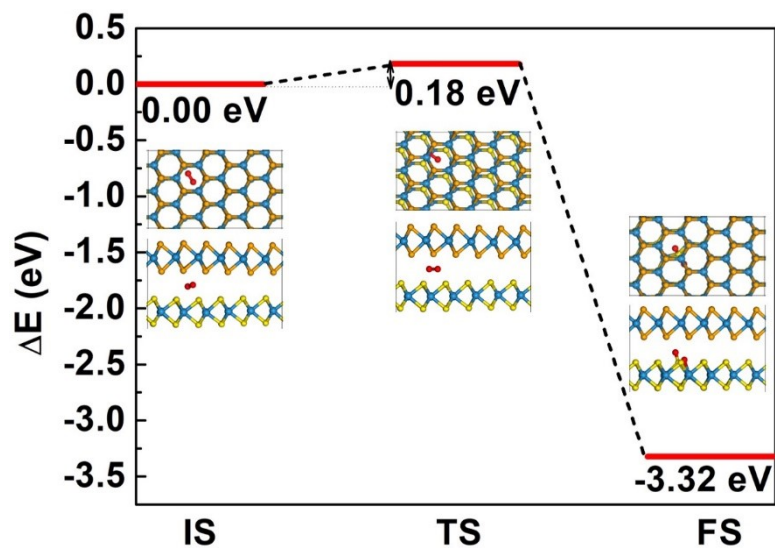

**Figure S4.** The dissociation pathway and barrier of  $O_2$  molecule in the interlayer of  $WSe_2/WS_2$  heterostructure. The inset shows the top and side view of the structure of initial state (IS), transition state (TS) and final state (FS).

The energy barrier for the  $O_2$  dissociation in interlayer of  $WSe_2/WS_2$  heterostructure is 0.18 eV, according to the CI-NEB calculation as shown in Figure S4.

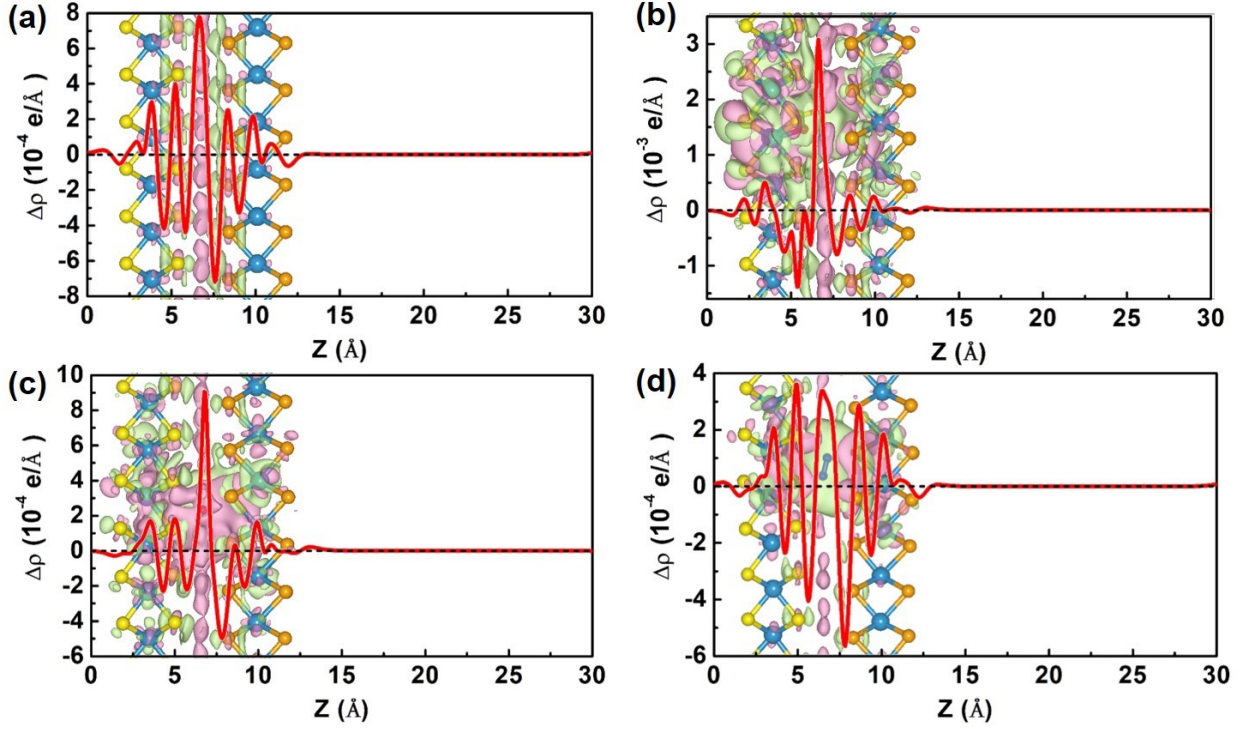

**Figure S5.** The charge density difference and the planar-average charge density difference along the Z direction of (a) pristine, (b) O<sub>2</sub> intercalated, (c) H<sub>2</sub>O intercalated and (d) N<sub>2</sub> intercalated WSe<sub>2</sub>/WS<sub>2</sub> vdW heterostructures, respectively. The pink and green color represents the charge accumulation and depletion, respectively. The isosurface value is set as 0.0001 |e|/Bohr<sup>3</sup>.

The confinement environment does activate O<sub>2</sub>, H<sub>2</sub>O and N<sub>2</sub> molecules, which can be understood by analyzing the charge transfer. The charge density difference ( $\Delta\rho$ ) was calculated as follows,

$$\Delta\rho = \rho_{\text{total}} - \rho_{\text{WSe}_2} - \rho_{\text{WS}_2} - \rho_{\text{O}_2/\text{H}_2\text{O}/\text{N}_2} \quad (1)$$

where  $\rho_{\text{total}}$ ,  $\rho_{\text{WSe}_2}$ ,  $\rho_{\text{WS}_2}$  and  $\rho_{\text{O}_2/\text{H}_2\text{O}/\text{N}_2}$  denote the charge density of heterostructure, monolayer WSe<sub>2</sub>, monolayer WS<sub>2</sub>, two O atoms and H<sub>2</sub>O and N<sub>2</sub> molecule, respectively.

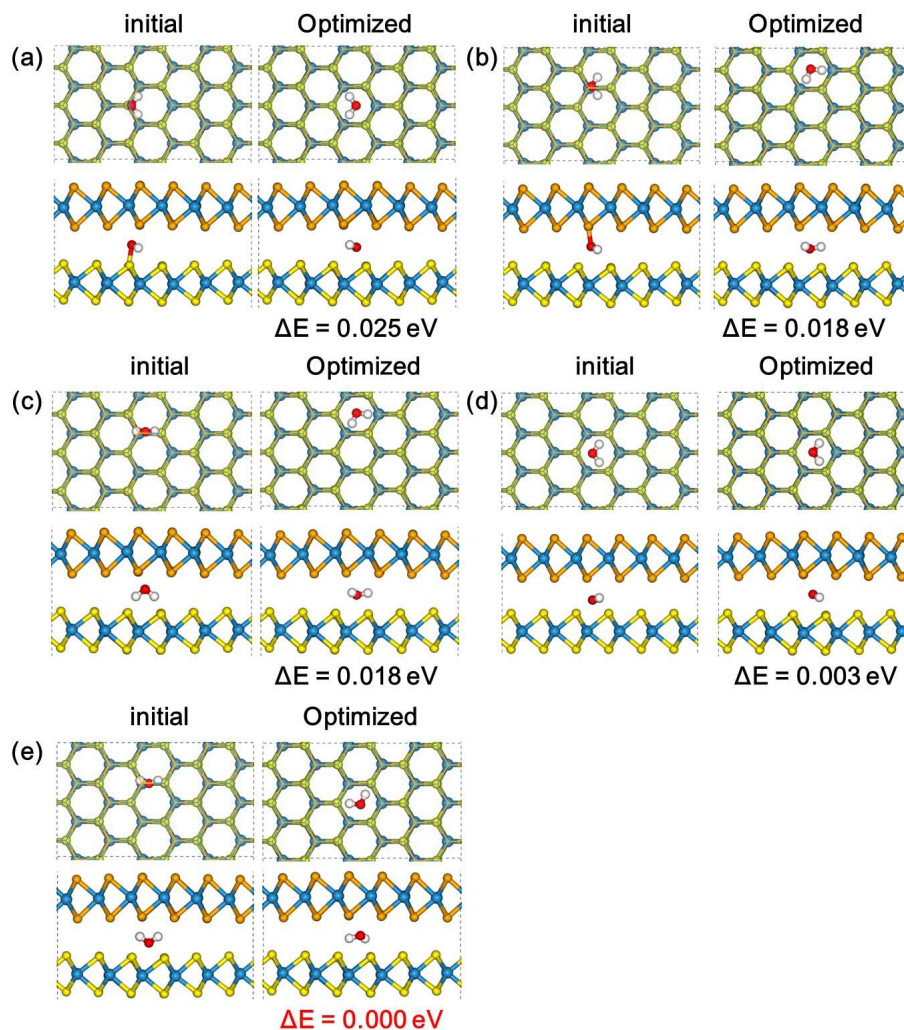

**Figure S6.** (a-e) The optimized structure of H<sub>2</sub>O intercalated WSe<sub>2</sub>/WS<sub>2</sub> vdW heterostructures.

We tested three cases, molecule initial located at the interlayer site, initial adsorption on WS<sub>2</sub> layer and initial adsorption on WSe<sub>2</sub> layer. Intercalation at different positions in the interlayer of WSe<sub>2</sub>/WS<sub>2</sub> heterostructure for H<sub>2</sub>O has shown in the Figure S6. As shown in Figure S6, the H<sub>2</sub>O molecule prefers to locate at the hollow site independent of initial configurations. The two H atoms of H<sub>2</sub>O molecule tend to be closer to S atoms of the WS<sub>2</sub> layer.

**Table S2.** The bond lengths of O-H, S-H and Se-H and bond angle of HOH and *d* for the optimized structure in Figure S6.

| <b>System</b>       | <b>Vacuum</b> | <b>a</b> | <b>b</b>    | <b>c</b>    | <b>d</b>    | <b>e</b>    |
|---------------------|---------------|----------|-------------|-------------|-------------|-------------|
| <b>O-H (Å)</b>      | 0.972         | 0.983    | 0.982/0.983 | 0.985       | 0.984/0.985 | 0.983       |
| <b>S-H (Å)</b>      | -             | -        | -           | -           | 1.950/1.954 | 1.950/1.954 |
| <b>Se-H (Å)</b>     | -             | 2.084    | 2.083       | 2.082/2.083 | -           | -           |
| <b>∠HOH (°)</b>     | 104.553       | 104.085  | 104.008     | 104.203     | 104.171     | 104.012     |
| <b><i>d</i> (Å)</b> | -             | 3.189    | 3.184       | 3.184       | 3.182       | 3.180       |

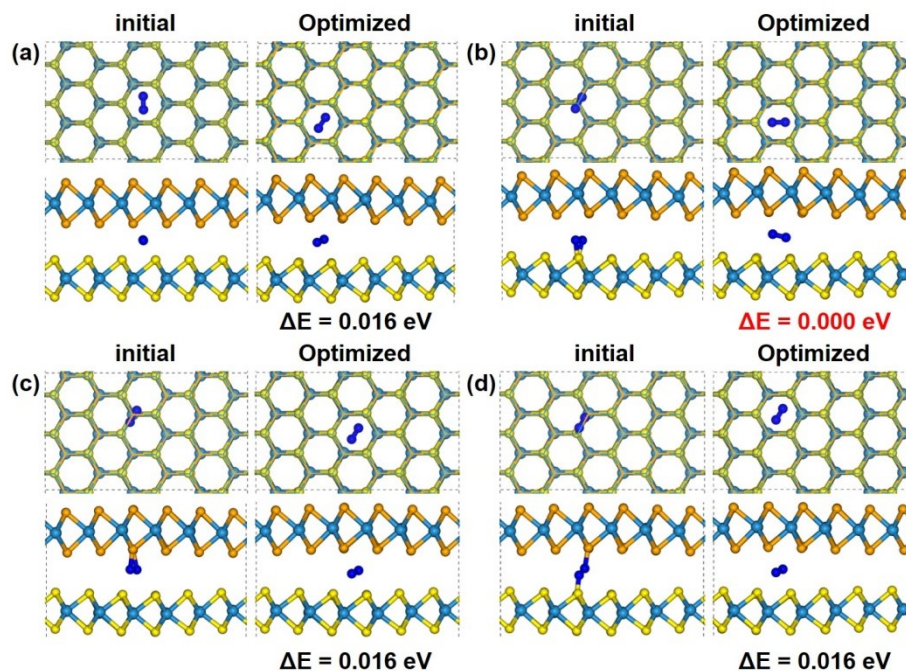

**Figure S7.** (a-d) The initial and optimized structure of  $\text{N}_2$  intercalated  $\text{WSe}_2/\text{WS}_2$  vdW heterostructures.

We tested three cases, molecule initial located at the interlayer site, initial adsorption on  $\text{WS}_2$  layer and initial adsorption on  $\text{WSe}_2$  layer. Intercalation at different positions in the interlayer of  $\text{WSe}_2/\text{WS}_2$  heterostructure for  $\text{N}_2$  has shown in the Figure S7. As shown in Figure S7, the  $\text{N}_2$  molecule prefers to locate at the hollow site after optimization independent of initial configurations.

**Table S3.** The bond lengths of N-N, N-S, N-Se and *d* for the optimized structure in Figure S7.

| <b>System</b>       | <b>Vacuum</b> | <b>a</b>      | <b>b</b>      | <b>c</b>      | <b>d</b>      |
|---------------------|---------------|---------------|---------------|---------------|---------------|
| <b>N-N (Å)</b>      | 1.114         | 1.125         | 1.125         | 1.125         | 1.125         |
| <b>N-S (Å)</b>      | -             | 2.493 (2.534) | 2.518 (2.515) | 2.482 (2.524) | 2.487 (2.526) |
| <b>N-Se (Å)</b>     | -             | 2.561 (2.604) | 2.570 (2.594) | 2.565 (2.595) | 2.557 (2.597) |
| <b><i>d</i> (Å)</b> | -             | 3.373         | 3.371         | 3.351         | 3.359         |

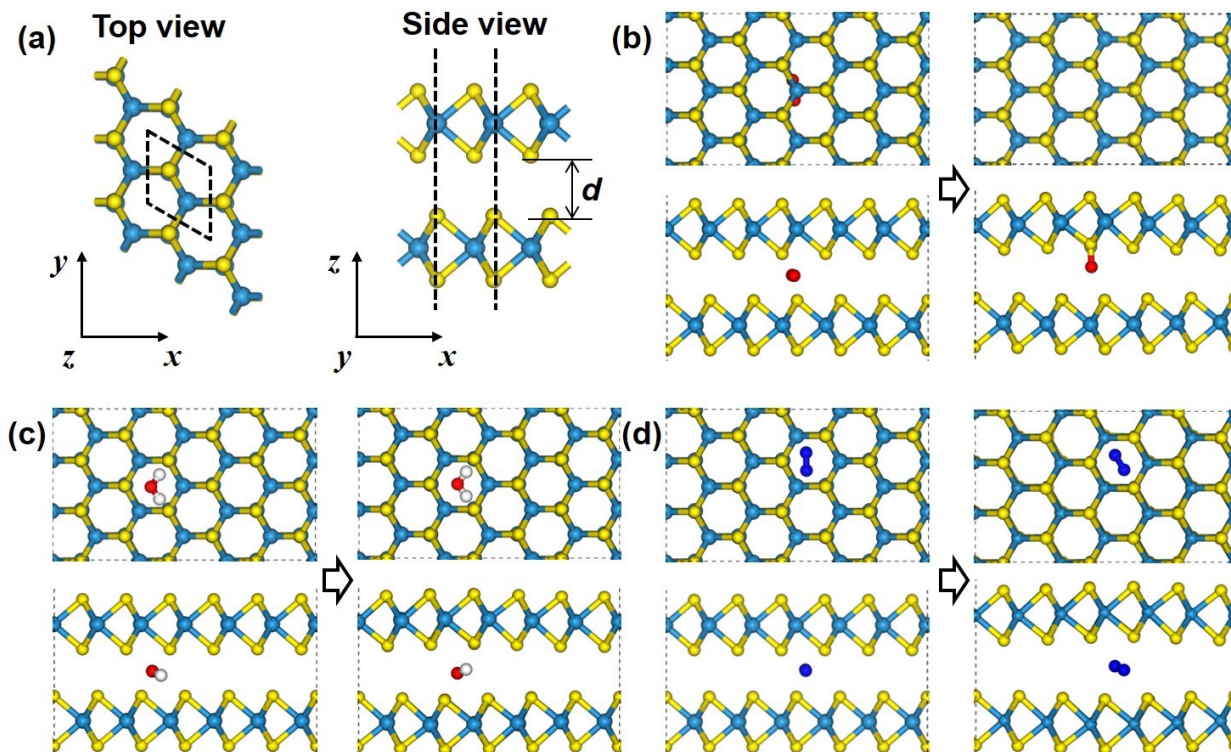

**Figure S8.** (a) The top and side view of optimized bilayer WS<sub>2</sub>. The primitive cell is marked by black dashed line. The initial (left panel) and optimized (right panel) structure of (b) O<sub>2</sub> intercalated, (c) H<sub>2</sub>O intercalated and (d) N<sub>2</sub> intercalated bilayer WS<sub>2</sub>, respectively.

Whether it is strain that causes O<sub>2</sub> dissociation is unclear. To examine this, the O<sub>2</sub>, H<sub>2</sub>O and N<sub>2</sub> intercalation in unstrained bilayer WS<sub>2</sub> layer with 2H stacking was investigated as shown in Figure S8. Similar to the case of the intercalation in WSe<sub>2</sub>/WS<sub>2</sub> heterostructure, in the bilayer WS<sub>2</sub>, O<sub>2</sub> tends to dissociate while H<sub>2</sub>O and N<sub>2</sub> keeps intact. Therefore, the strain effect on the dissociation of O<sub>2</sub> molecule can be excluded.

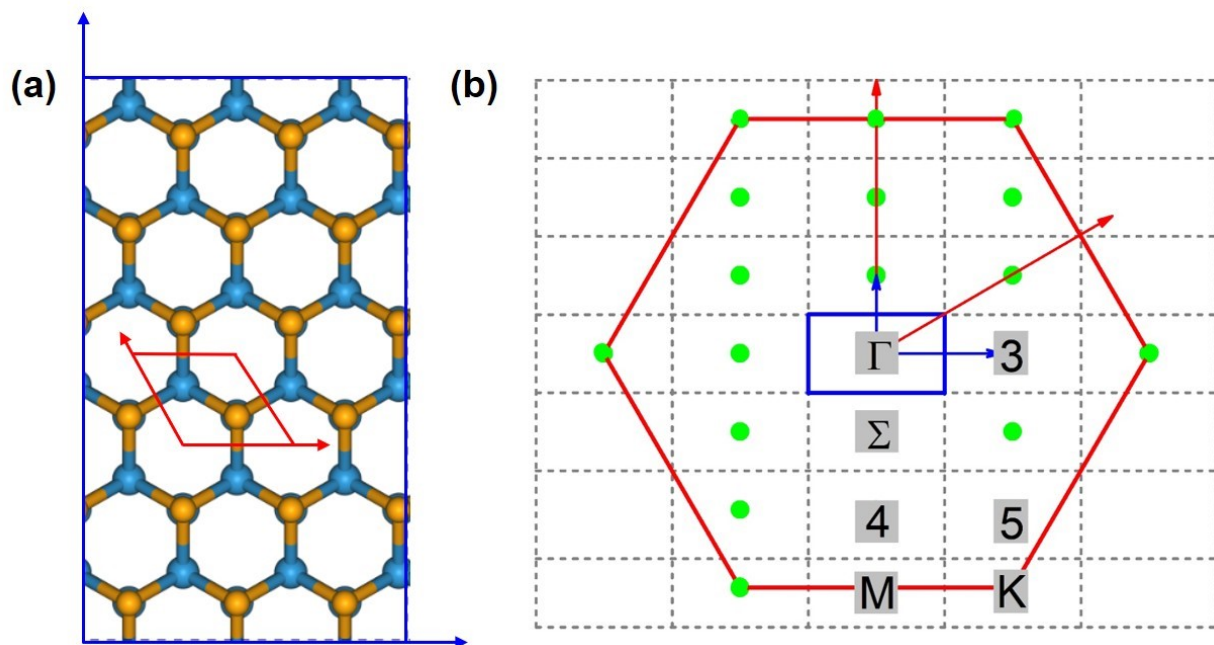

**Figure S9.** (a) The lattice of primitive cell (red line) and supercell (blue line) of WSe<sub>2</sub>/WS<sub>2</sub> vdW heterostructure. (b) The corresponding high symmetric K points.

The large supercell induced band folding containing seven irreducible K points as show in Figure S9.

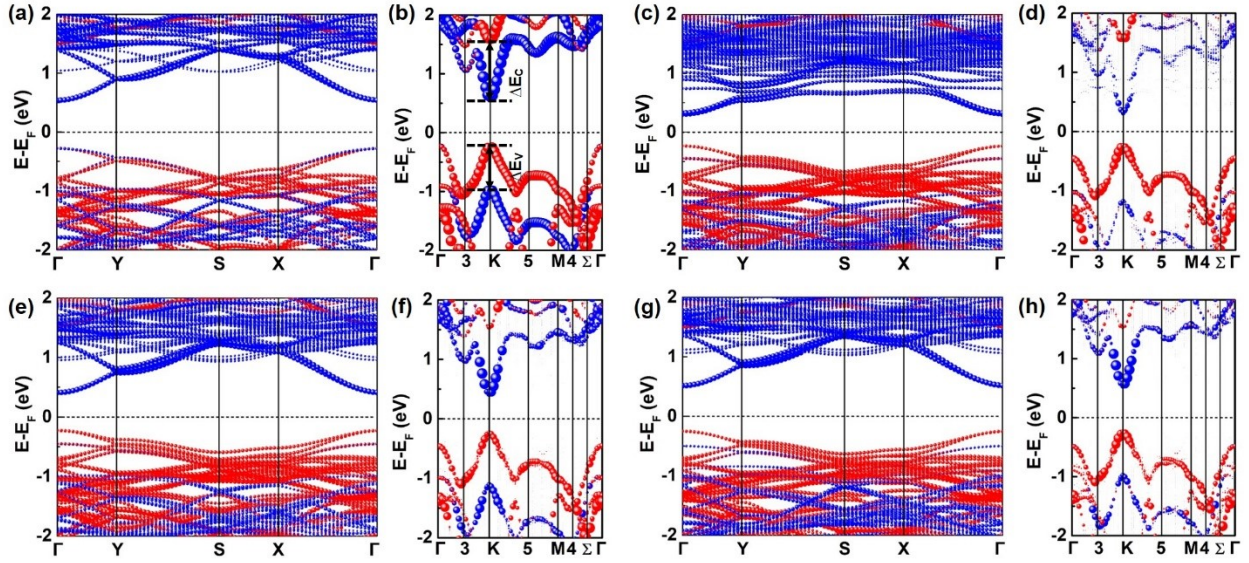

**Figure S10.** The projected band structures of supercell and corresponding unfolding band structures for (a, b) pristine, (c, d) O<sub>2</sub> intercalated, (e, f) H<sub>2</sub>O intercalated and (g, h) N<sub>2</sub> intercalated heterostructures. Blue, red and green color circles are states contributed by WS<sub>2</sub> layer, WSe<sub>2</sub> layer and intercalation molecule, respectively. The CBM band offset  $\Delta E_C$  and VBM band offset  $\Delta E_V$  is marked in (b).

In order to clearly show the changes of band edge position, the band structures of pristine, O<sub>2</sub> intercalated, H<sub>2</sub>O intercalated and N<sub>2</sub> intercalated WSe<sub>2</sub>/WS<sub>2</sub> heterostructures are unfolded as shown in Figure S10b, d, f, h, respectively. Compared with the pristine heterostructure, the CBM band offset  $\Delta E_C$  between the CBM at K of WS<sub>2</sub> (CB-WS<sub>2</sub>@K) state and the CBM at K of WSe<sub>2</sub> (CB-WSe<sub>2</sub>@K) state increased after molecule intercalation. The VBM at  $\Gamma$  of WSe<sub>2</sub> (VB-WSe<sub>2</sub>@ $\Gamma$ ) state moved down after molecule intercalation. The VBM at K of WS<sub>2</sub> (VB-WS<sub>2</sub>@K) state also shifted down. Correspondingly, the VBM band offset  $\Delta E_V$  between VB-WS<sub>2</sub>@K state and VB-WSe<sub>2</sub>@K state increased after molecule intercalation. The  $\Delta E_C$  and  $\Delta E_V$  of pristine, O<sub>2</sub> intercalated, H<sub>2</sub>O intercalated and N<sub>2</sub> intercalated heterostructures are summarized in Table S4.

**Table S4.** The  $\Delta E_c$  and  $\Delta E_v$  of pristine, O<sub>2</sub> intercalated, H<sub>2</sub>O intercalated and N<sub>2</sub> intercalated heterostructures.

| <b>System</b>                       | <b>WSe<sub>2</sub>/WS<sub>2</sub></b> | <b> O<sub>2</sub> </b> | <b> H<sub>2</sub>O </b> | <b> N<sub>2</sub> </b> |
|-------------------------------------|---------------------------------------|------------------------|-------------------------|------------------------|
| <b><math>\Delta E_c</math> (eV)</b> | 0.73                                  | 0.94                   | 0.88                    | 0.74                   |
| <b><math>\Delta E_v</math> (eV)</b> | 0.98                                  | 1.25                   | 1.14                    | 1.00                   |

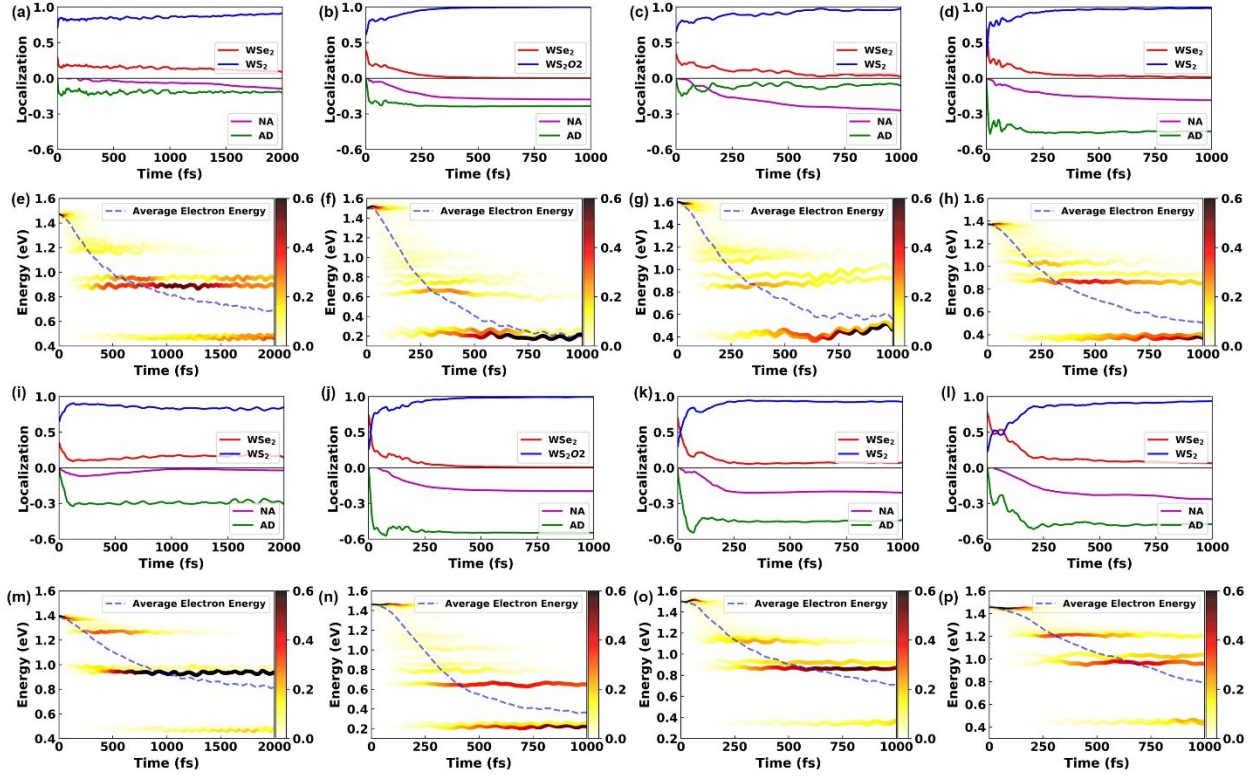

**Figure S11.** The time-dependent spatial electron localization on (a, i) pristine, (b, j)  $O_2$  intercalated, (c, k)  $H_2O$  intercalated and (d, l)  $N_2$  molecule intercalated  $WSe_2/WS_2$  vdW heterostructures at 300 K and 78 K, respectively. The time-dependent electron energy of (e, m) pristine, (f, n)  $O_2$  intercalated, (g, o)  $H_2O$  intercalated and (h, p)  $N_2$  intercalated  $WSe_2/WS_2$  vdW heterostructures at 300 K and 78 K, respectively. The color strips represent the distribution of electron on different energy level orbitals. The darker the color, the more electrons are distribution in this orbital. The blue dashed line denotes the average electron energy. The energy reference is the Fermi level of each system.

Figure S11i-p is the time dependent electron localization on two layers and electron energy change of pristine,  $O_2$  intercalated,  $H_2O$  intercalated and  $N_2$  intercalated heterostructures at 78 K, respectively. For pristine,  $O_2$  intercalated,  $H_2O$  intercalated and  $N_2$  intercalated heterostructures, the initial electron population on  $WSe_2$  layer is 35%, 74%, 70%, 77%, respectively. Then a fast charge transfer from  $WSe_2$  to  $WS_2$  layer occurs and the electron population on  $WSe_2$  layer reduces to 9%, 23%, 15%, 47% within 124 fs, 27 fs, 68 fs, 29 fs, respectively. AD mechanism contributes the fast charge transfer process. Note that the fast stage is still slower than the 300 K indicating that the AD mechanism depends on temperature. Subsequently, the electron population on  $WSe_2$  layer slowly decreased and converged to 15%, 0%, 7% and 6%, respectively. This process is contributed by both AD and NA mechanism. The average electron energy of pristine,  $H_2O$  intercalated and  $N_2$  intercalated heterostructure is not converged to CB- $WS_2@K$  state within 1ps, while the average electron energy of  $O_2$  intercalated heterostructure is close to

the CB-WS<sub>2</sub>@K state indicating O<sub>2</sub> intercalated promote the intervalley electron transfer from CB-WSe<sub>2</sub>@K state to CB-WS<sub>2</sub>@K state.

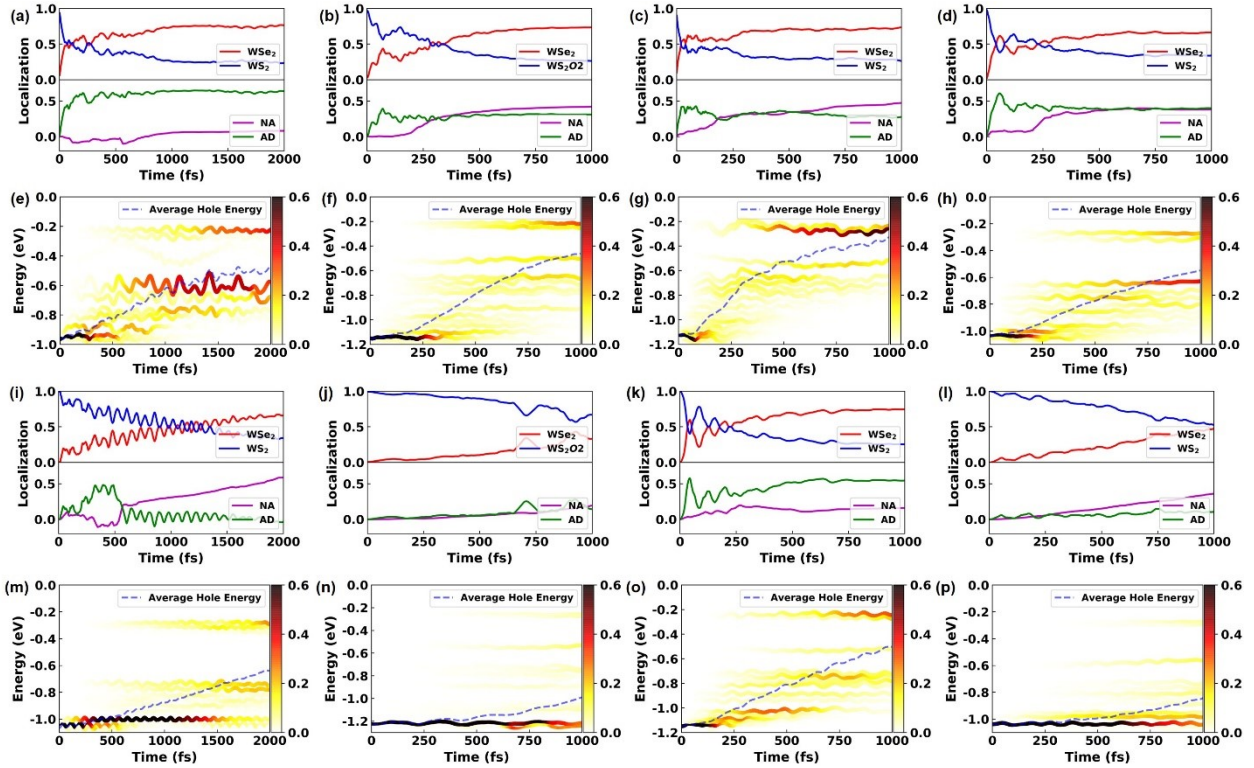

**Figure S12.** The time-dependent spatial hole localization on (a, i) pristine, (b, j) O<sub>2</sub> intercalated, (c, k) H<sub>2</sub>O intercalated and (d, l) N<sub>2</sub> molecule intercalated WSe<sub>2</sub>/WS<sub>2</sub> vdW heterostructures at 300 K and 78 K, respectively. The time-dependent hole energy of (e, m) pristine, (f, n) O<sub>2</sub> intercalated, (g, o) H<sub>2</sub>O intercalated and (h, p) N<sub>2</sub> intercalated WSe<sub>2</sub>/WS<sub>2</sub> vdW heterostructures at 300 K and 78 K, respectively. The color strips represent the distribution of hole on different energy level orbitals. The darker the color, the more holes are distribution in this orbital. The blue dashed line denotes the average hole energy. The energy reference is the Fermi level of each system.

Figure S12i-p is the time dependent hole population and hole energy change of pristine, O<sub>2</sub>, H<sub>2</sub>O and N<sub>2</sub> intercalated WSe<sub>2</sub>/WS<sub>2</sub> heterostructures at 78 K, respectively. The hole transfer process for pristine, O<sub>2</sub> intercalated and N<sub>2</sub> intercalated heterostructures are significantly slower than that at 300 K as shown in Figure S12i,j,l and Figure S12a,b,d. The initial hole population on WS<sub>2</sub> layer of pristine, O<sub>2</sub> intercalated and N<sub>2</sub> intercalated heterostructure is 100%. After 1ps, the hole population on WS<sub>2</sub> layer slowly reduced to 54%, 67% and 53%, respectively. NA mechanism dominates the slow process indicating that the NA mechanism depends on temperature. For the case of H<sub>2</sub>O intercalated, the initial hole population on WS<sub>2</sub> layer is 100%. A fast hole transfer occurs within 33 fs, where the hole population on WS<sub>2</sub> layer is reduced to 50%. In this process, AD dominates the fast hole transfer process. After 1ps, the hole population on WS<sub>2</sub> layer slowly decreased and converged to 25%. As shown in Figure S12m,n,p, the average hole energy is nearly unchanged within 1 ps for pristine, O<sub>2</sub> intercalated and N<sub>2</sub> intercalated heterostructures. While the average hole energy of H<sub>2</sub>O intercalated heterostructure

reached the  $\text{VB-WSe}_2@I$  state within 1ps, indicating  $\text{H}_2\text{O}$  intercalation promotes the hole transfer from  $\text{VB-WS}_2@K$  state to  $\text{VB-WSe}_2@I$  state.

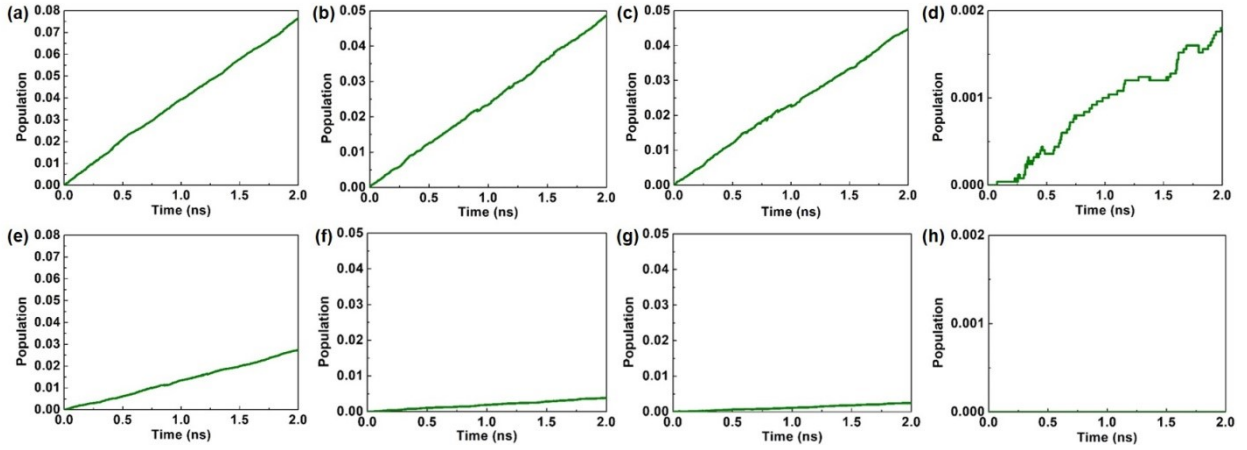

**Figure S13.** The time-dependent electron population on (a, e) pristine, (b, f)  $O_2$  intercalated, (c, g)  $H_2O$  intercalated and (d, h)  $N_2$  molecule intercalated  $WSe_2/WS_2$  vdW heterostructures at 300 K and 78 K, respectively.

Figure S13e-h is the time dependent electron population on the VBM of pristine,  $O_2$  intercalated,  $H_2O$  intercalated and  $N_2$  intercalated heterostructures at 78 K, respectively. At 78 K, only 2.7%, 0.4%, 0.2%, and 0% electrons are relaxed from CBM to VBM within 2 ns for pristine,  $O_2$ ,  $H_2O$  and  $N_2$  intercalated heterostructures, respectively. Note that the recombination rate in molecule intercalated heterostructure is still slower than that in pristine heterostructure. In particularly, the recombination in  $N_2$  intercalated heterostructure is totally suppressed at 78 K.

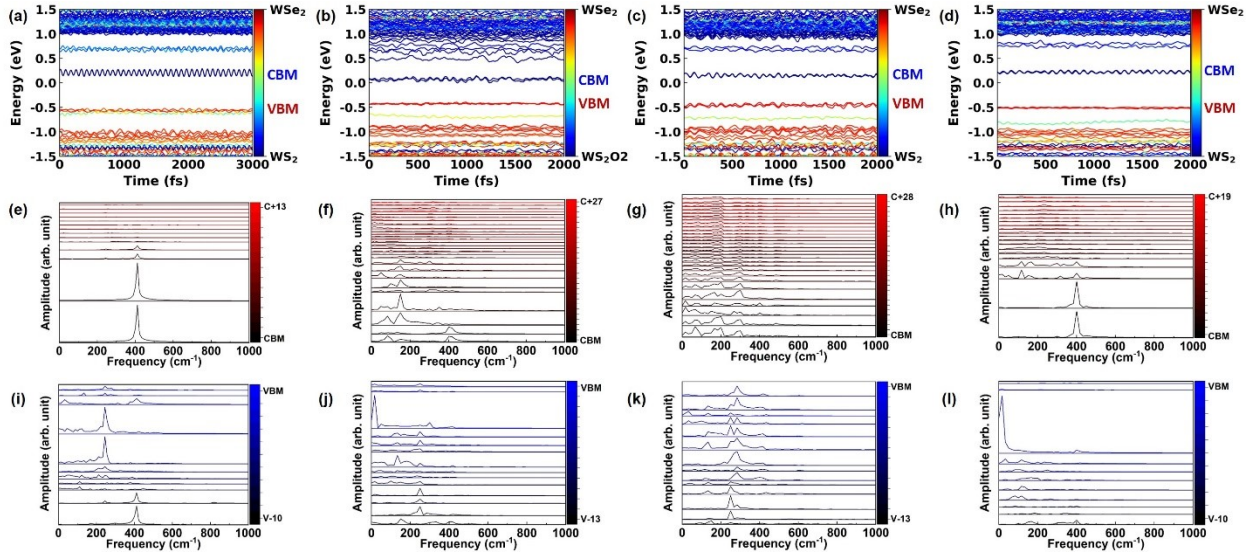

**Figure S14.** The time-dependent energy level evolution at  $\Gamma$  point of (a) pristine, (b) O<sub>2</sub> intercalated, (c) H<sub>2</sub>O intercalated and (d) N<sub>2</sub> intercalated WSe<sub>2</sub>/WS<sub>2</sub> vdW heterostructures at 78 K, respectively. The color bar in (a-d) represents the contribution from WSe<sub>2</sub> layer (red part) and WS<sub>2</sub> layer (blue part), respectively. Fourier transforms of the donor and relevant acceptor energy states during the process of electron transfer and hole transfer in (e, i) pristine, (f, j) O<sub>2</sub> intercalated, (g, k) H<sub>2</sub>O intercalated and (h, l) N<sub>2</sub> intercalated WSe<sub>2</sub>/WS<sub>2</sub> vdW heterostructures at 78 K, respectively. The color bar in (e-l) represent the band number.

The time dependent energy level evolution of pristine, O<sub>2</sub> intercalated, H<sub>2</sub>O intercalated and N<sub>2</sub> intercalated heterostructures at 78 K is shown in Figure S14a-d. It can be seen that the energy state oscillation amplitude at 78 K is weaker than that at 300 K. The smaller fluctuation of energy states is because thermal excited nuclear motion at 78 K is weaker than that at 300 K. Except for O<sub>2</sub> intercalation, CBM+3 level and CBM+4 level is gaped, which slows the electron transfer process. In the hole transfer process, the donor state is gapped with acceptor for pristine, O<sub>2</sub> intercalated and N<sub>2</sub> intercalated heterostructures which suppressed hole transfer. For H<sub>2</sub>O intercalated heterostructure, the donor state and acceptor state have significant orbital hybridization, which promotes the fast hole transfer.

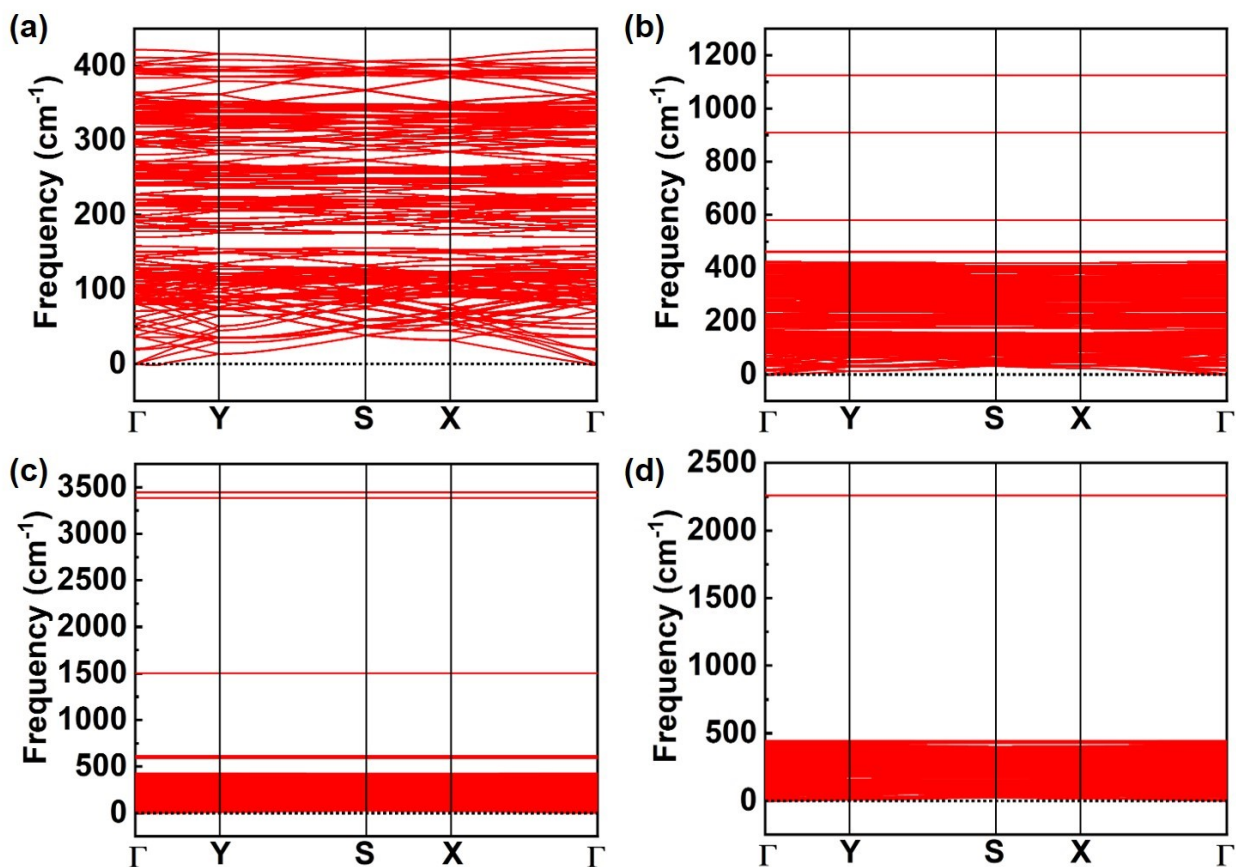

**Figure S15.** The phonon spectra of (a) pristine, (b) O<sub>2</sub> intercalated, (c) H<sub>2</sub>O intercalated and (d) N<sub>2</sub> intercalated heterostructures, respectively.

The phonon spectra of pristine, O<sub>2</sub> intercalated, H<sub>2</sub>O intercalated and N<sub>2</sub> intercalated WSe<sub>2</sub>/WS<sub>2</sub> heterostructures were computed using the finite displacement approach with a  $1 \times 1 \times 1$  supercell and a  $1 \times 1 \times 1$  k-point grid, as implemented in the PHONOPY code.<sup>10</sup> As shown in Figure S15a-d, molecule intercalation induces high frequency phonons.

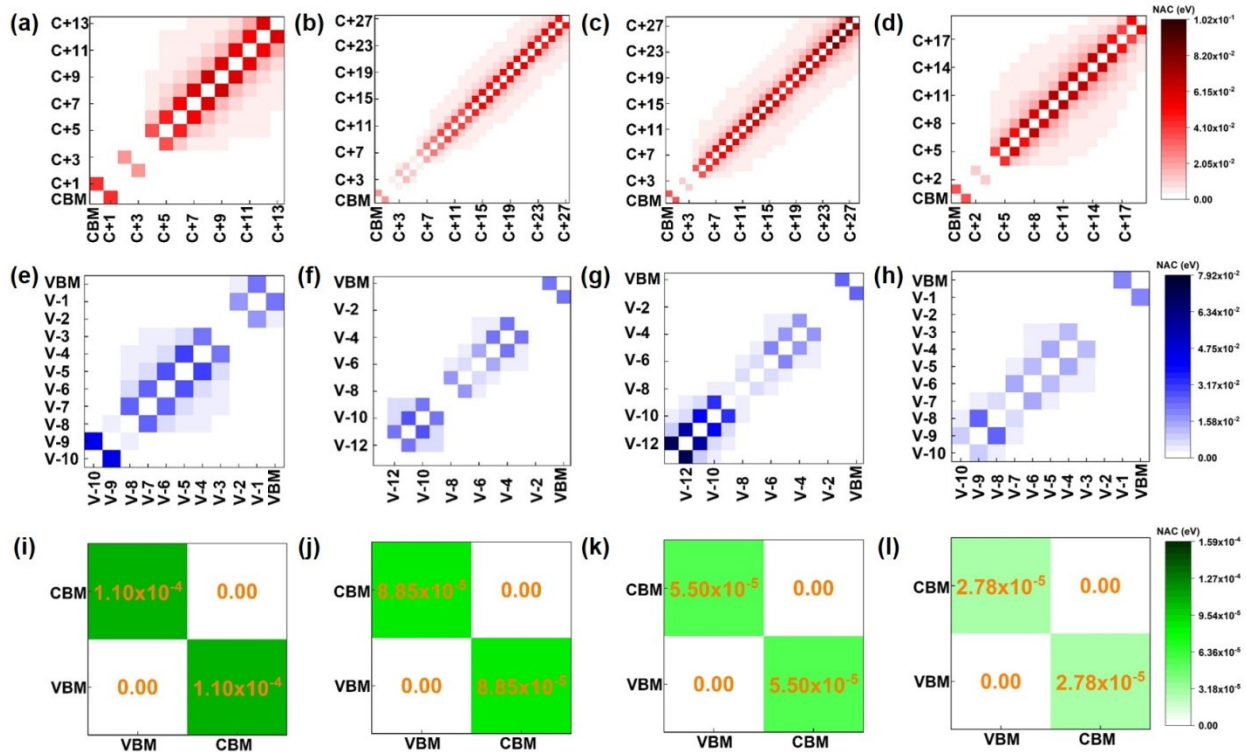

**Figure S16.** The averaged NAC values between the orbitals in the process of electron transfer, hole transfer and recombination in (a, e, i) pristine, (b, f, j) O<sub>2</sub> intercalated, (c, g, k) H<sub>2</sub>O intercalated and (d, h, l) N<sub>2</sub> intercalated WSe<sub>2</sub>/WS<sub>2</sub> vdW heterostructures at 78 K, respectively. Here, C+1, C+2, ... means CBM+1, CBM+2, ... level, respectively; V-1, V-2, ... means VBM-1, VBM-2, ... energy level, respectively.

At lower temperature of 78 K, the average NAC values become smaller than that at 300 K as shown in Figure S16. Thus, at low temperature the process of electron and hole transfer as well as recombination slows down. It is note that, at 78 K, the average NAC values between CBM and VBM of molecule intercalated heterostructures are still smaller than that in pristine heterostructures, which is consistent with the results of Figure S13e-h. The average band gaps of pristine, O<sub>2</sub> intercalated, H<sub>2</sub>O intercalated and N<sub>2</sub> intercalated heterostructures at 78 K are 0.76 eV, 0.48 eV, 0.59 eV and 0.72 eV as shown in Figure S17b, indicating that the energy difference is not the main factor. The relative phonon amplitude of CBM and VBM state of pristine, O<sub>2</sub> intercalated, H<sub>2</sub>O intercalated and N<sub>2</sub> intercalated heterostructures at 78 K is shown in Figure S18b. After molecule intercalation, the phonon amplitude of CBM state and VBM state is reduced significantly compared with pristine heterostructure, indicating the smaller phonon occupation and weaker electron-phonon coupling element. The RMSD of pristine, O<sub>2</sub>, H<sub>2</sub>O and N<sub>2</sub> intercalated heterostructures at 78 K are shown in Figure S19e-h. Molecule intercalation increases RMSD, indicating larger nuclear velocity. Thus, the reduced electron-phonon coupling element of CBM state and VBM state in molecule intercalation heterostructure is the main factor for the smaller average NAC value.

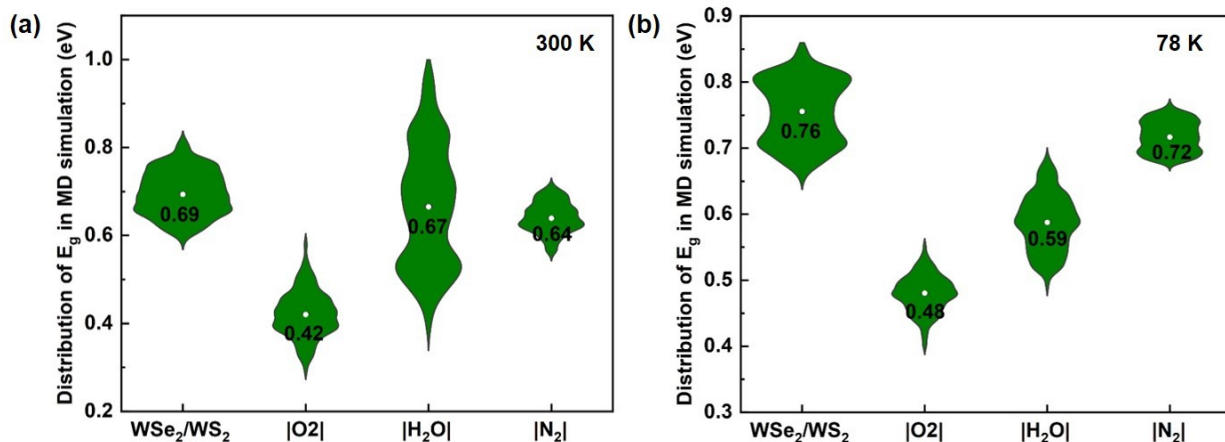

**Figure S17.** The band gap distribution during MD simulation of pristine, O<sub>2</sub> intercalated, H<sub>2</sub>O intercalated and N<sub>2</sub> intercalated WSe<sub>2</sub>/WS<sub>2</sub> vdW heterostructures at (a) 300 K and (b) 78 K, respectively. The average PBE band gap values are labeled in the center.

As shown in Figure S17, we plot the band gap distribution during MD simulation, and the average band gap of pristine, O<sub>2</sub>, H<sub>2</sub>O and N<sub>2</sub> intercalated heterostructures are reduced compared with the static computation. The average band gaps of pristine, O<sub>2</sub>, H<sub>2</sub>O and N<sub>2</sub> intercalated heterostructures are 0.69 eV, 0.42 eV, 0.67 eV and 0.64 eV, respectively. The average band gaps of pristine, O<sub>2</sub> intercalated, H<sub>2</sub>O intercalated and N<sub>2</sub> intercalated heterostructures at 78 K are 0.76 eV, 0.48 eV, 0.59 eV and 0.72 eV as shown in Figure S17b.

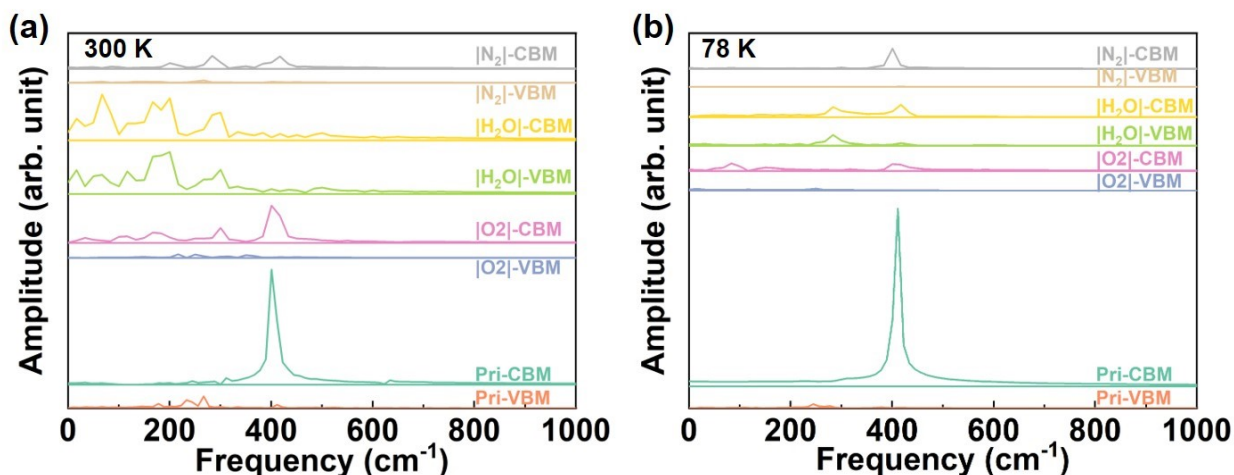

**Figure S18.** Fourier transforms of CBM and VBM of pristine,  $\text{O}_2$  intercalated,  $\text{H}_2\text{O}$  intercalated and  $\text{N}_2$  intercalated heterostructures at (a) 300 K and (b) 78 K, respectively.

As shown in Figure S18a, the relative phonon amplitude of CBM and VBM state of pristine,  $\text{O}_2$  intercalated,  $\text{H}_2\text{O}$  intercalated and  $\text{N}_2$  intercalated heterostructures at 300 K are plotted. It can be seen that after molecule intercalation, the phonon amplitudes of CBM state and VBM state are reduced indicating the smaller phonon occupation and weaker electron-phonon coupling element. The relative phonon amplitude of CBM and VBM state of pristine,  $\text{O}_2$  intercalated,  $\text{H}_2\text{O}$  intercalated and  $\text{N}_2$  intercalated heterostructures at 78 K is shown in Figure S18b. After molecule intercalation, the phonon amplitude of CBM state and VBM state is reduced significantly compared with pristine heterostructure, indicating the smaller phonon occupation and weaker electron-phonon coupling element.

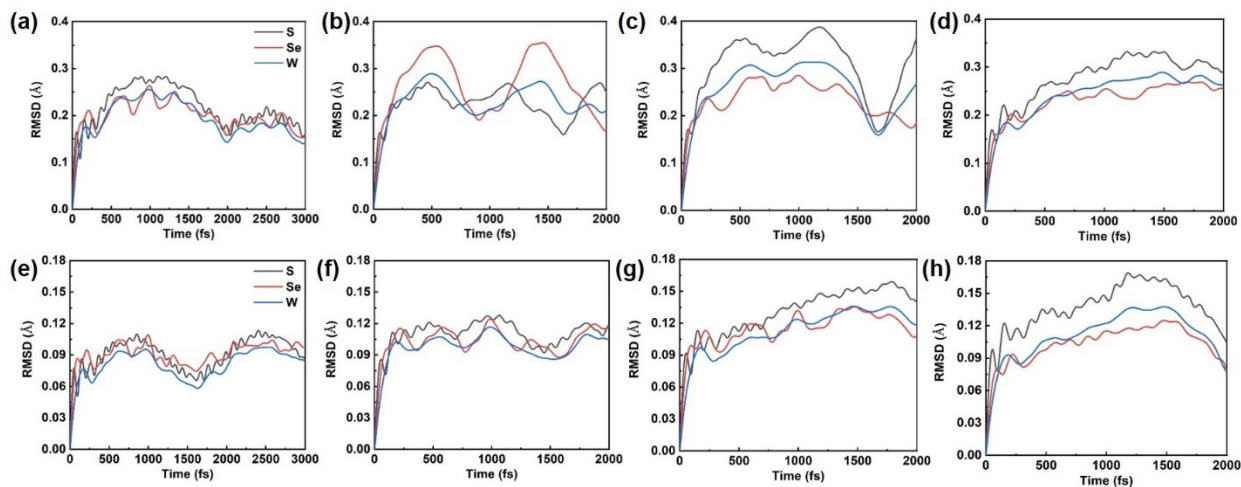

**Figure S19.** The RMSD of S, Se and W atoms during MD simulation of (a, e) pristine, (b, f)  $O_2$  intercalated, (c, g)  $H_2O$  intercalated and (d, h)  $N_2$  intercalated  $WSe_2/WS_2$  vdW heterostructures at 300 K and 78 K, respectively.

The time dependent RMSD of pristine,  $O_2$  intercalated,  $H_2O$  intercalated and  $N_2$  intercalated heterostructures at 300 K is shown in Figure S19a-d, respectively. It can be seen that,  $O_2$  intercalated,  $H_2O$  intercalated and  $N_2$  intercalated heterostructures have the larger RMSD than pristine heterostructure indicating the larger nuclear velocity which expect to lead the larger NAC values. The RMSD of pristine,  $O_2$ ,  $H_2O$  and  $N_2$  intercalated heterostructures at 78 K are shown in Figure S19e-h. Molecule intercalation increases RMSD, indicating larger nuclear velocity.

## References

- 1 G. Kresse and J. Furthmüller, *Phys. Rev. B*, 1996, **54**, 11169.
- 2 G. Kresse and D. Joubert, *Phys. Rev. B*, 1999, **59**, 1758.
- 3 J. P. Perdew, K. Burke and M. Ernzerhof, *Phys. Rev. Lett.*, 1996, **77**, 3865.
- 4 H. Zeng, X. Liu, H. Zhang and X. Cheng, *Phys. Chem. Chem. Phys.*, 2021, **23**, 694-701.
- 5 H. J. Monkhorst and J. D. Pack, *Phys. Rev. B*, 1976, **13**, 5188-5192.
- 6 Q. Zheng, W. Chu, C. Zhao, L. Zhang, H. Guo, Y. Wang, X. Jiang and J. Zhao, *WIREs Comput. Mol. Sci.*, 2019, **9**, e1411.
- 7 J. C. Tully, *J. Chem. Phys.*, 1990, **93**, 1061-1071.
- 8 H. M. Jaeger, S. Fischer and O. V. Prezhdo, *J. Chem. Phys.*, 2012, **137**, 22A545.
- 9 G. Bussi, D. Donadio and M. Parrinello, *J. Chem. Phys.*, 2003, **119**, 2481.
- 10 A. Togo and I. Tanaka, *Scr. Mater.*, 2015, **108**, 1-5.
